# Supplementary material for: Novel copper(ii) complexes with fenamates and isonicotinamide: structure and properties, and interactions with DNA and serum albumin
Source: Royal Society of Chemistry journal article supplement (doi:10.1039/d0nj02007a), 2020-01-01
Supplement: d0nj02007a1.pdf [file d0nj02007a1.pdf]

## Novel copper(II) complexes with fenamates and isonicotinamide: structure and properties, interaction with DNA and serum albumin

Flóra Jozefíková,<sup>a,b</sup> Spyros Perontsis,<sup>b</sup> Miriama Šimunková,<sup>c</sup> Zuzana Barbieriková,<sup>c</sup> Ľubomír Švorc,<sup>d</sup> Marian Valko,<sup>c</sup> George Psomas,<sup>b,\*</sup> Ján Moncol,<sup>a,\*</sup>

<sup>a</sup> Department of Inorganic Chemistry, Faculty of Chemical and Food Technology, Slovak University of Technology, Radlinského 9, 812 37, Bratislava, SLOVAKIA

<sup>b</sup> Department of General and Inorganic Chemistry, Faculty of Chemistry, Aristotle University of Thessaloniki, GR-54124 Thessaloniki, GREECE

<sup>c</sup> Department of Physical Chemistry, Faculty of Chemical and Food Technology, Slovak University of Technology, Radlinského 9, 812 37, Bratislava, SLOVAKIA

<sup>d</sup> Department of Analytical Chemistry, Faculty of Chemical and Food Technology, Slovak University of Technology, Radlinského 9, 812 37, Bratislava, SLOVAKIA

### Supplementary material

#### Albumin binding studies

The extent of the inner-filter effect can be roughly estimated with the following equation:

$$I_{corr} = I_{meas} \times 10^{\frac{\varepsilon(\lambda_{exc})cd}{2}} \times 10^{\frac{\varepsilon(\lambda_{em})cd}{2}} \quad (\text{eq. S1})$$

where  $I_{corr}$  = corrected intensity,  $I_{meas}$  = the measured intensity,  $c$  = the concentration of the quencher,  $d$  = the cuvette (1 cm),  $\varepsilon(\lambda_{exc})$  and  $\varepsilon(\lambda_{em})$  = the  $\varepsilon$  of the quencher at the excitation and the emission wavelength, respectively, as calculated from the UV-vis spectra of the complexes <sup>1</sup>.

The Stern-Volmer and Scatchard equations and graphs have been used in order to study the interaction of a quencher with serum albumins. The Stern-Volmer constant,  $K_{SV}$  (in  $M^{-1}$ ), and the quenching constant,  $k_q$  (in  $M^{-1}s^{-1}$ ), may be derived from the Stern-Volmer equation <sup>2</sup>:

$$\frac{I_0}{I} = 1 + k_q \tau_0 [Q] = 1 + K_{SV} [Q] \quad (\text{eq. S2})$$

where  $I_0$  = the initial tryptophan fluorescence intensity of SA,  $I$  = the tryptophan fluorescence intensity of SA after the addition of the quencher,  $k_q$  = the quenching rate constant,  $K_{SV}$  = the Stern-Volmer constant,  $\tau_0$  = the average fluorescence lifetime of SA ( $= 10^{-8}$  s),  $[Q]$  = the concentration of

---

\*Corresponding authors' e-mails:

(G. Psomas) [gepsomas@chem.auth.gr](mailto:gepsomas@chem.auth.gr)

(J. Moncol) [jan.moncol@stuba.sk](mailto:jan.moncol@stuba.sk)

the quencher, respectively,  $K_{SV}$  (in  $M^{-1}$ ) can be obtained by the slope of the diagram  $\frac{I_0}{I}$  versus  $[Q]$ , and subsequently  $k_q$  (in  $M^{-1} s^{-1}$ ) may be calculated from equation [2]:

$$K_{SV} = k_q \tau_0 \quad (\text{eq. S3})$$

From the Scatchard equation [2]:

$$\frac{\Delta I/I_0}{[Q]} = nK - K \frac{\Delta I}{I_0} \quad (\text{eq. S4})$$

the SA-binding constant  $K$  (in  $M^{-1}$ ) may be calculated from the slope in the Scatchard plots  $\frac{\Delta I/I_0}{[Q]}$  versus  $\frac{\Delta I}{I_0}$  and the number of binding sites per albumin ( $n$ ) is given by the ratio of y intercept to the slope <sup>2</sup>.

### DNA binding studies

The DNA-binding constant ( $K_b$ , in  $M^{-1}$ ) can be obtained by monitoring the changes in the absorbance at the corresponding  $\lambda_{\max}$  with increasing concentrations of CT DNA and it is given by the ratio of slope to the y intercept in plots  $[DNA]/(\varepsilon_A - \varepsilon_f)$  versus  $[DNA]$ , according to the Wolfe-Shimer equation <sup>3</sup>:

$$\frac{[DNA]}{(\varepsilon_A - \varepsilon_f)} = \frac{[DNA]}{(\varepsilon_b - \varepsilon_f)} + \frac{1}{K_b(\varepsilon_A - \varepsilon_f)} \quad (\text{eq. S5})$$

where  $[DNA]$  is the concentration of DNA in base pairs,  $\varepsilon_f$  is the extinction coefficient for the free complex at the corresponding  $\lambda_{\max}$ ,  $\varepsilon_A = A_{\text{obsd}}/[ \text{compound} ]$  and  $\varepsilon_b$  is the extinction coefficient for the complex in the fully bound form.

The linear Stern-Volmerequation (eq. S2) has been used in order to study the quenching of EB bound to DNA by the compounds, where  $I_0$  and  $I$  are the emission intensities of EB-DNA conjugate in the absence and the presence of the quencher, respectively,  $[Q]$  is the concentration of the quencher (i.e. compounds) <sup>2</sup>. The values of the Stern-Volmer constant  $K_{SV}$  ( $M^{-1}$ ) are obtained by

the slope of the diagram  $\frac{I_0}{I}$  versus  $[Q]$ . Taking  $\tau_0 = 23$  ns as the fluorescence lifetime of the EB-DNA system <sup>4</sup>, the quenching constants  $k_q$  (in  $M^{-1} s^{-1}$ ) of the compounds can be determined according to eq. S3.

### References

- 1 L. Stella, A.L. Capodilupo, M. Bietti, Chem. Commun., 2008, **39**, 4744-4746.
- 2 J.R. Lakowicz, Principles of Fluorescence Spectroscopy, 3rd Edn, Plenum Press, New York, 2006.
- 3 A. Wolfe, G. Shimer, T. Meehan., Biochemistry, 1987, **6**, 6392-6396.



**Table S1.** Hydrogen bonds for compounds **1-5**.

| D–H...O      | d(D–H)/Å | d(H...A)/Å | d(D...A)/Å | D–H...A/° | Symmetry            |
|--------------|----------|------------|------------|-----------|---------------------|
| <b>1</b>     |          |            |            |           |                     |
| N2–H2B...O2  | 0.86     | 2.13       | 2.948(3)   | 160       | +x, –1+y,+z         |
| N3–H3...O1   | 0.86     | 2.02       | 2.656(2)   | 130       | +x, –1+y,+z         |
| C4–H4...O2   | 0.93     | 2.35       | 3.224(3)   | 156       | +x, –1+y,+z         |
| <b>2</b>     |          |            |            |           |                     |
| N2–H2A...O3  | 0.86     | 2.17       | 3.020(3)   | 170       | 1/2–x, –1/2+y,1/2–z |
| N2–H2B...O2  | 0.86     | 2.17       | 3.015(3)   | 167       | 1–x, –y,1–z         |
| N3–H3...O1   | 0.86     | 1.91       | 2.590(3)   | 135       |                     |
| C4–H4...O2   | 0.93     | 2.40       | 3.262(3)   | 155       | 1–x, –y,1–z         |
| <b>3</b>     |          |            |            |           |                     |
| N2–H2B...O2  | 0.86     | 2.11       | 2.934(2)   | 160       | –x, –y,1–z          |
| N3–H3...O1   | 0.86     | 2.02       | 2.659(2)   | 129       |                     |
| C4–H4...O2   | 0.93     | 2.35       | 3.255(2)   | 156       | –x, –y,1–z          |
| <b>4</b>     |          |            |            |           |                     |
| N2–H2A...O3  | 0.88     | 2.05       | 2.884(3)   | 158       | –x, –y,–z           |
| N2–H2B...O2  | 0.88     | 2.04       | 2.893(3)   | 164       | 1–x, –y,1–z         |
| N3–H3...O1   | 0.88     | 1.99       | 2.706(2)   | 137       |                     |
| C4–H4...O2   | 0.95     | 2.40       | 3.317(3)   | 161       | 1–x, –y,1–z         |
| C19–H19...N4 | 0.95     | 2.23       | 2.860(3)   | 123       |                     |
| <b>5</b>     |          |            |            |           |                     |
| N2–H2A...O3  | 0.88     | 2.00       | 2.877(2)   | 158       | –x, 2–y,–z          |
| N2–H2B...O2  | 0.88     | 2.22       | 3.081(2)   | 164       | 1–x, 2–y,1–z        |
| N3–H3...O2   | 0.88     | 1.94       | 2.679(2)   | 137       |                     |
| C4–H4...O2   | 0.95     | 2.34       | 3.284(2)   | 171       | 1–x, 2–y,1–z        |
| C19–H19...N4 | 0.95     | 2.32       | 2.927(2)   | 121       |                     |
| C1–H1...F1   | 0.95     | 2.67       | 3.288(2)   | 123       | +x, +y,–1+z         |
| C1–H1...F2   | 0.95     | 2.66       | 3.340(2)   | 129       | +x, +y,–1+z         |
| C2–H2...F2   | 0.95     | 2.69       | 3.289(2)   | 122       | +x, +y,–1+z         |
| C13–H13...F2 | 0.95     | 2.67       | 3.376(2)   | 132       | +x, +y,–1+z         |

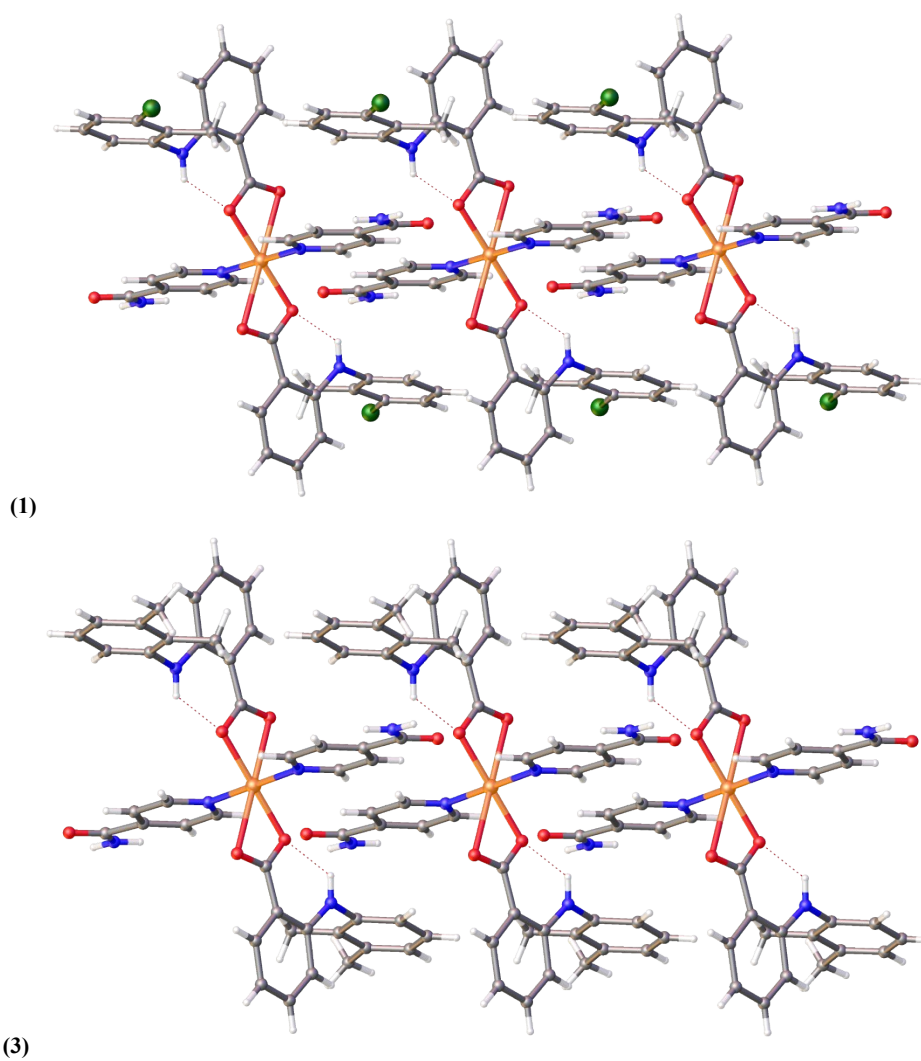

**Figure S1.** The  $\pi$ - $\pi$  stacking interaction between two isonicotinamide ligands in crystal structures of **1** and **3**.

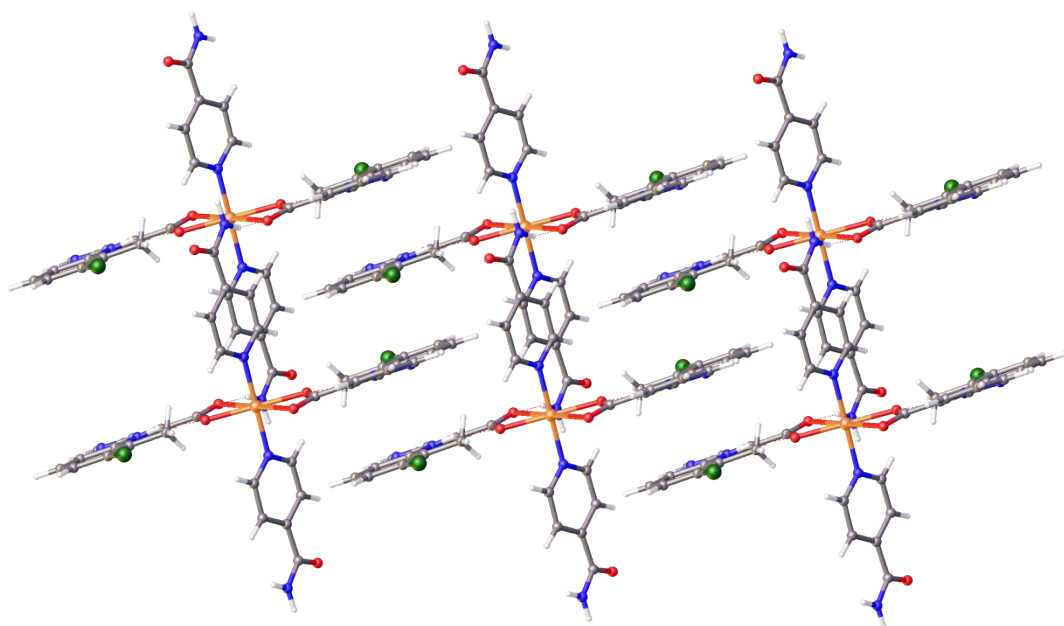

(4)

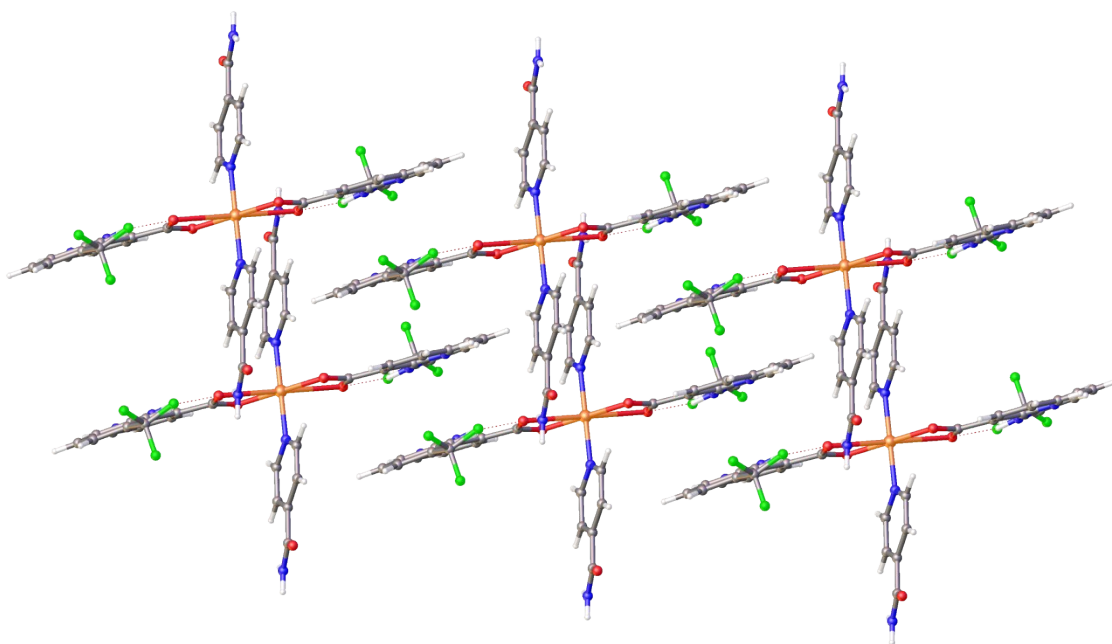

(5)

**FigureS2.** The  $\pi$ - $\pi$  stacking interaction between two fenamateligands in crystal structures of **4** and **5**.

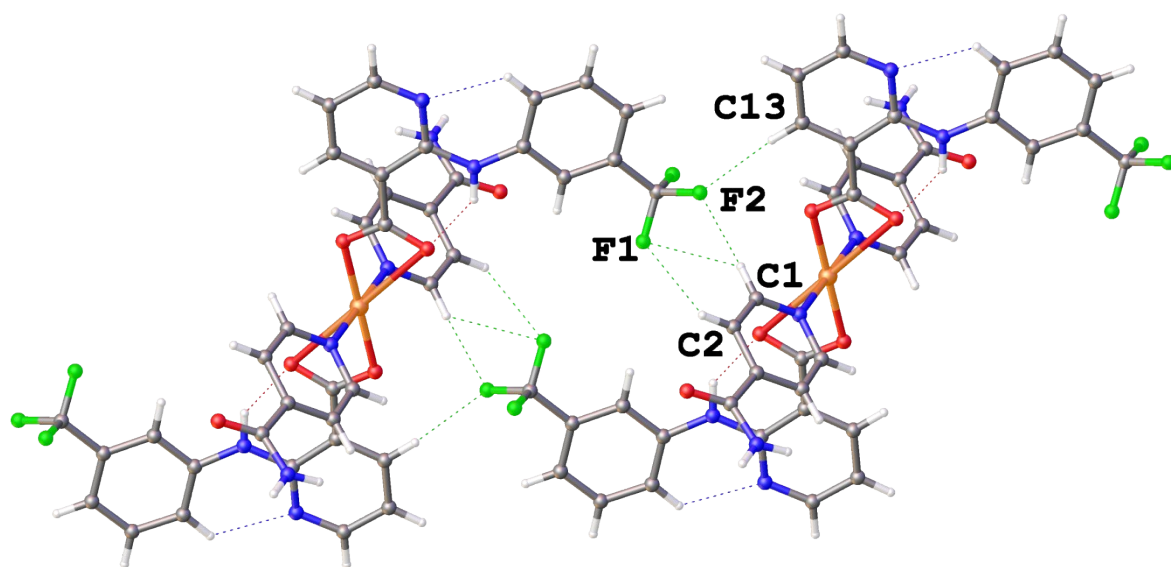

**Figure S3.** The C–H⋯F hydrogen bonding interaction in crystal structure of **5**.

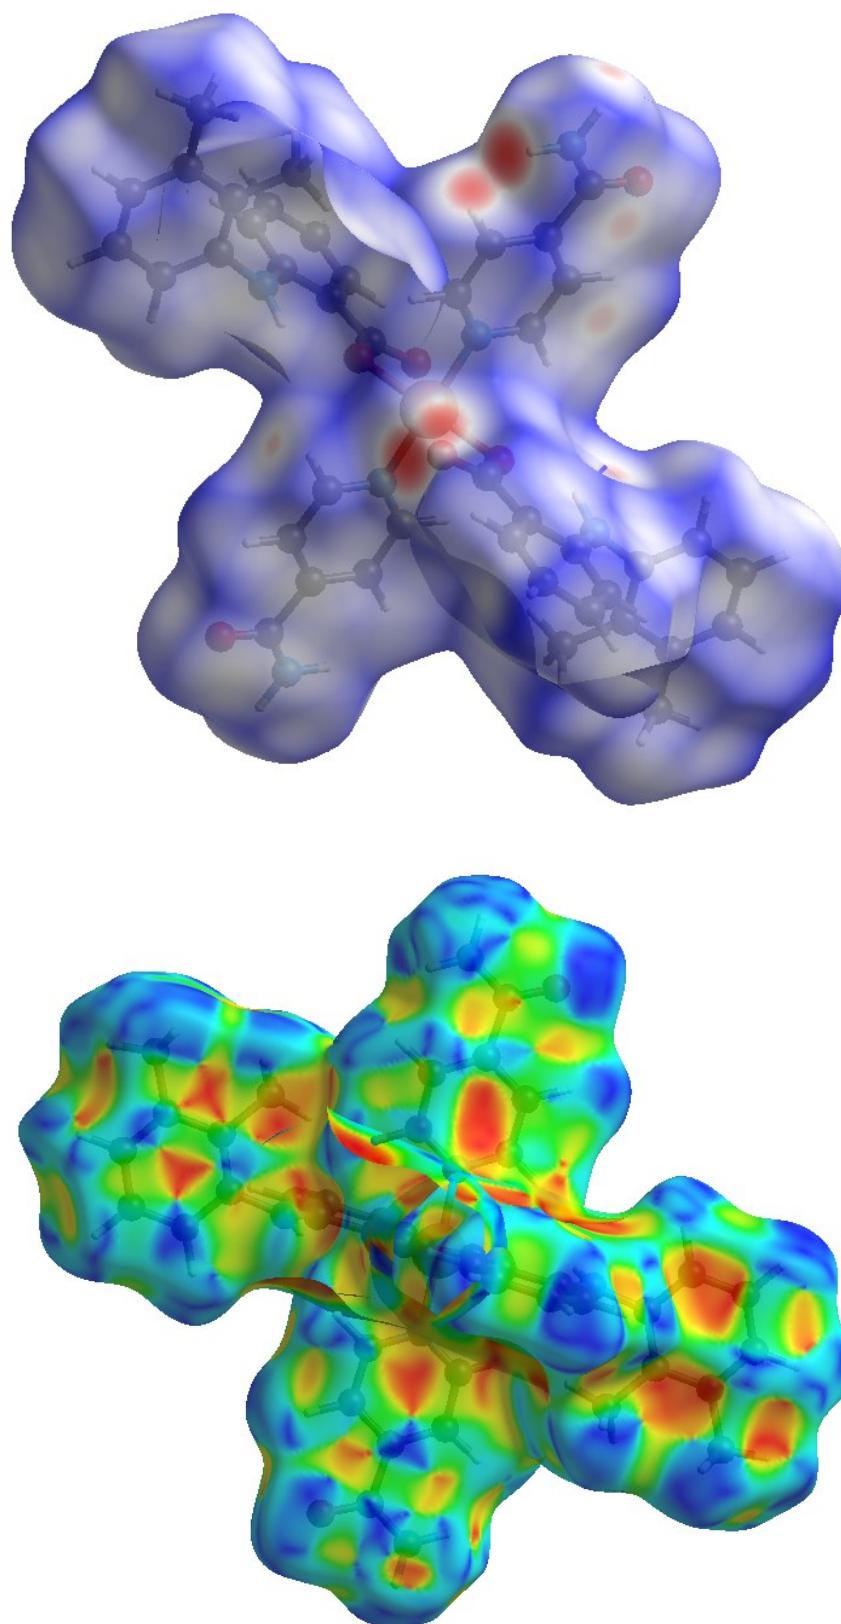

**Figure S4.** View of the three-dimensional Hirshfeld surface of **3** plotted over  $d_{\text{norm}}$  in the range -0.4902 to 1.2118 a.u. (top) and shape-index (bottom).



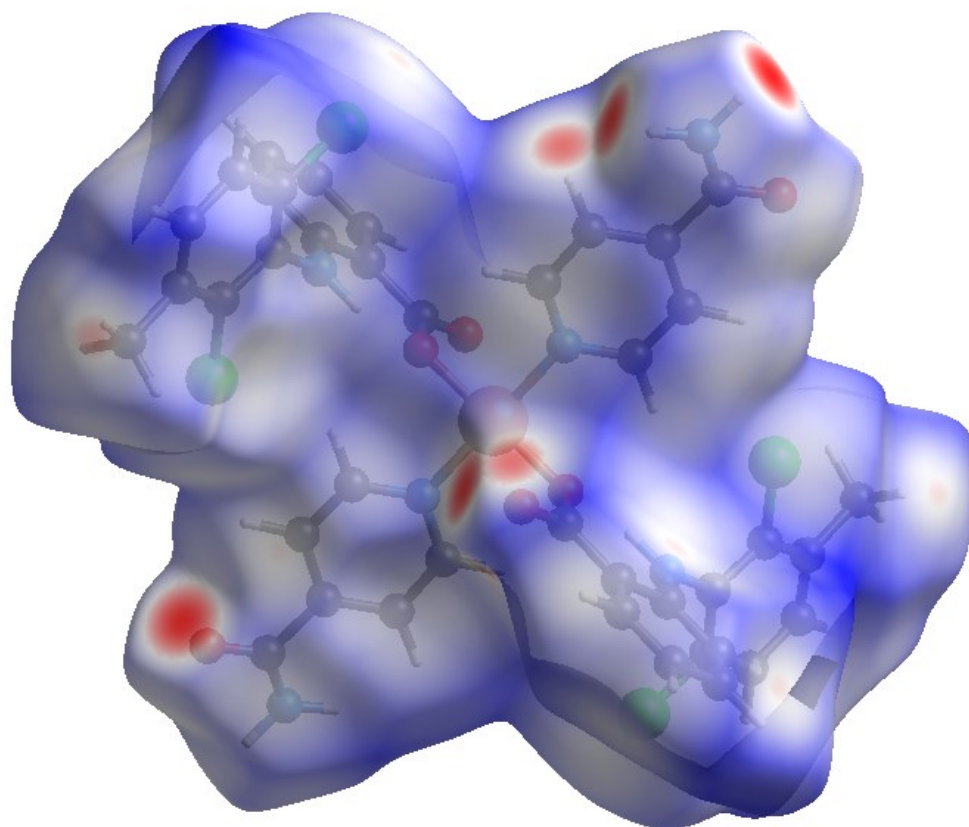

**Figure S5.** View of the three-dimensional Hirshfeld surface of **2** plotted over  $d_{\text{norm}}$  in the range -0.4498 to 1.5102 a.u..

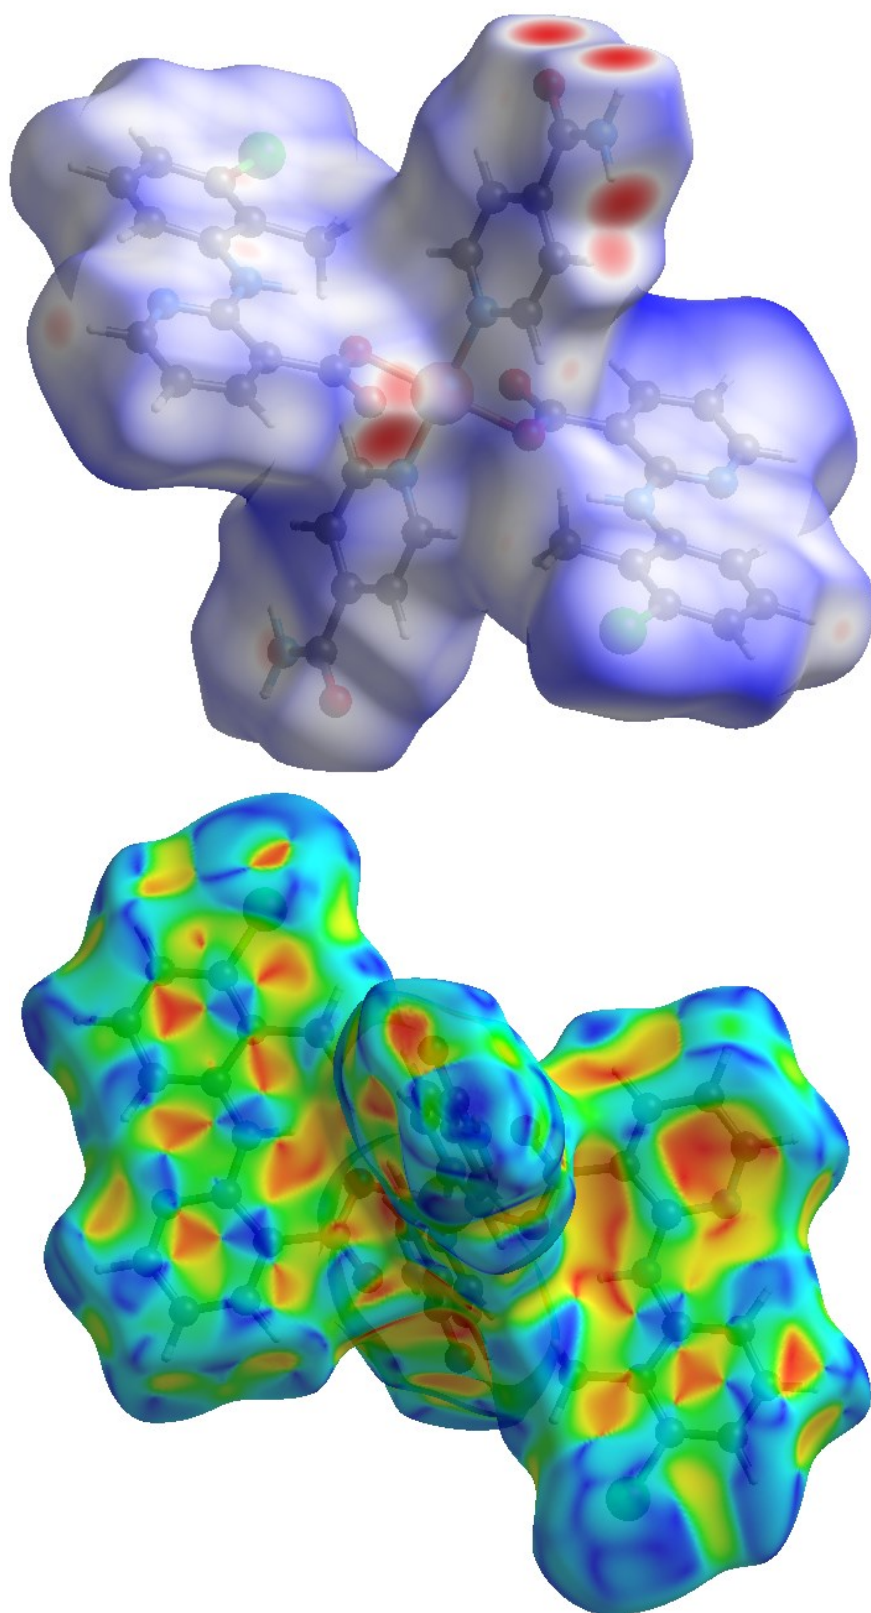

**Figure S6.** View of the three-dimensional Hirshfeld surface of **4** plotted over  $d_{\text{norm}}$  in the range -0.5379 to 1.6017a.u. (top) and shape-index (bottom).

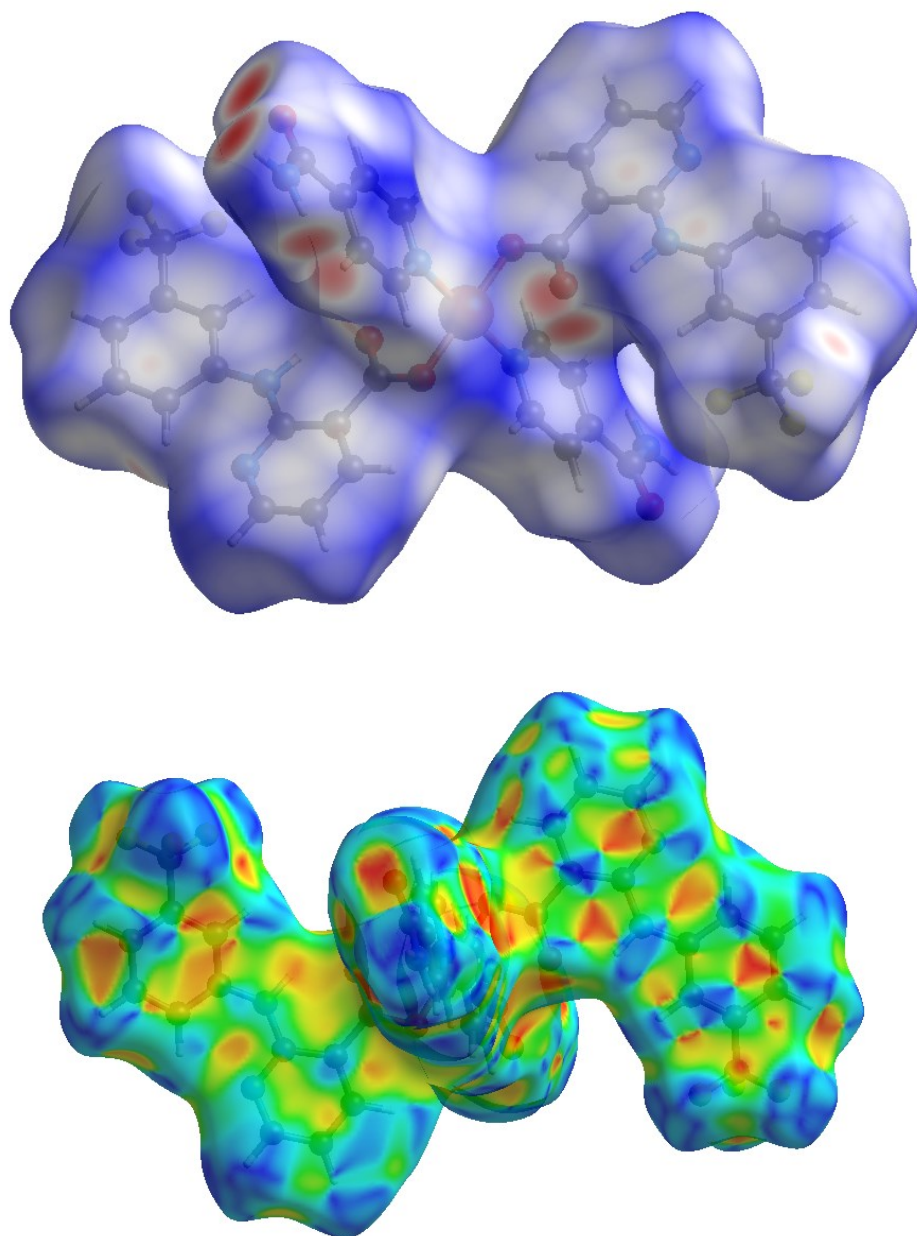

**Figure S7.** View of the three-dimensional Hirshfeld surface of **5** plotted over  $d_{\text{norm}}$  in the range -0.5661 to 1.1584 a.u. (top) and shape-index (bottom).

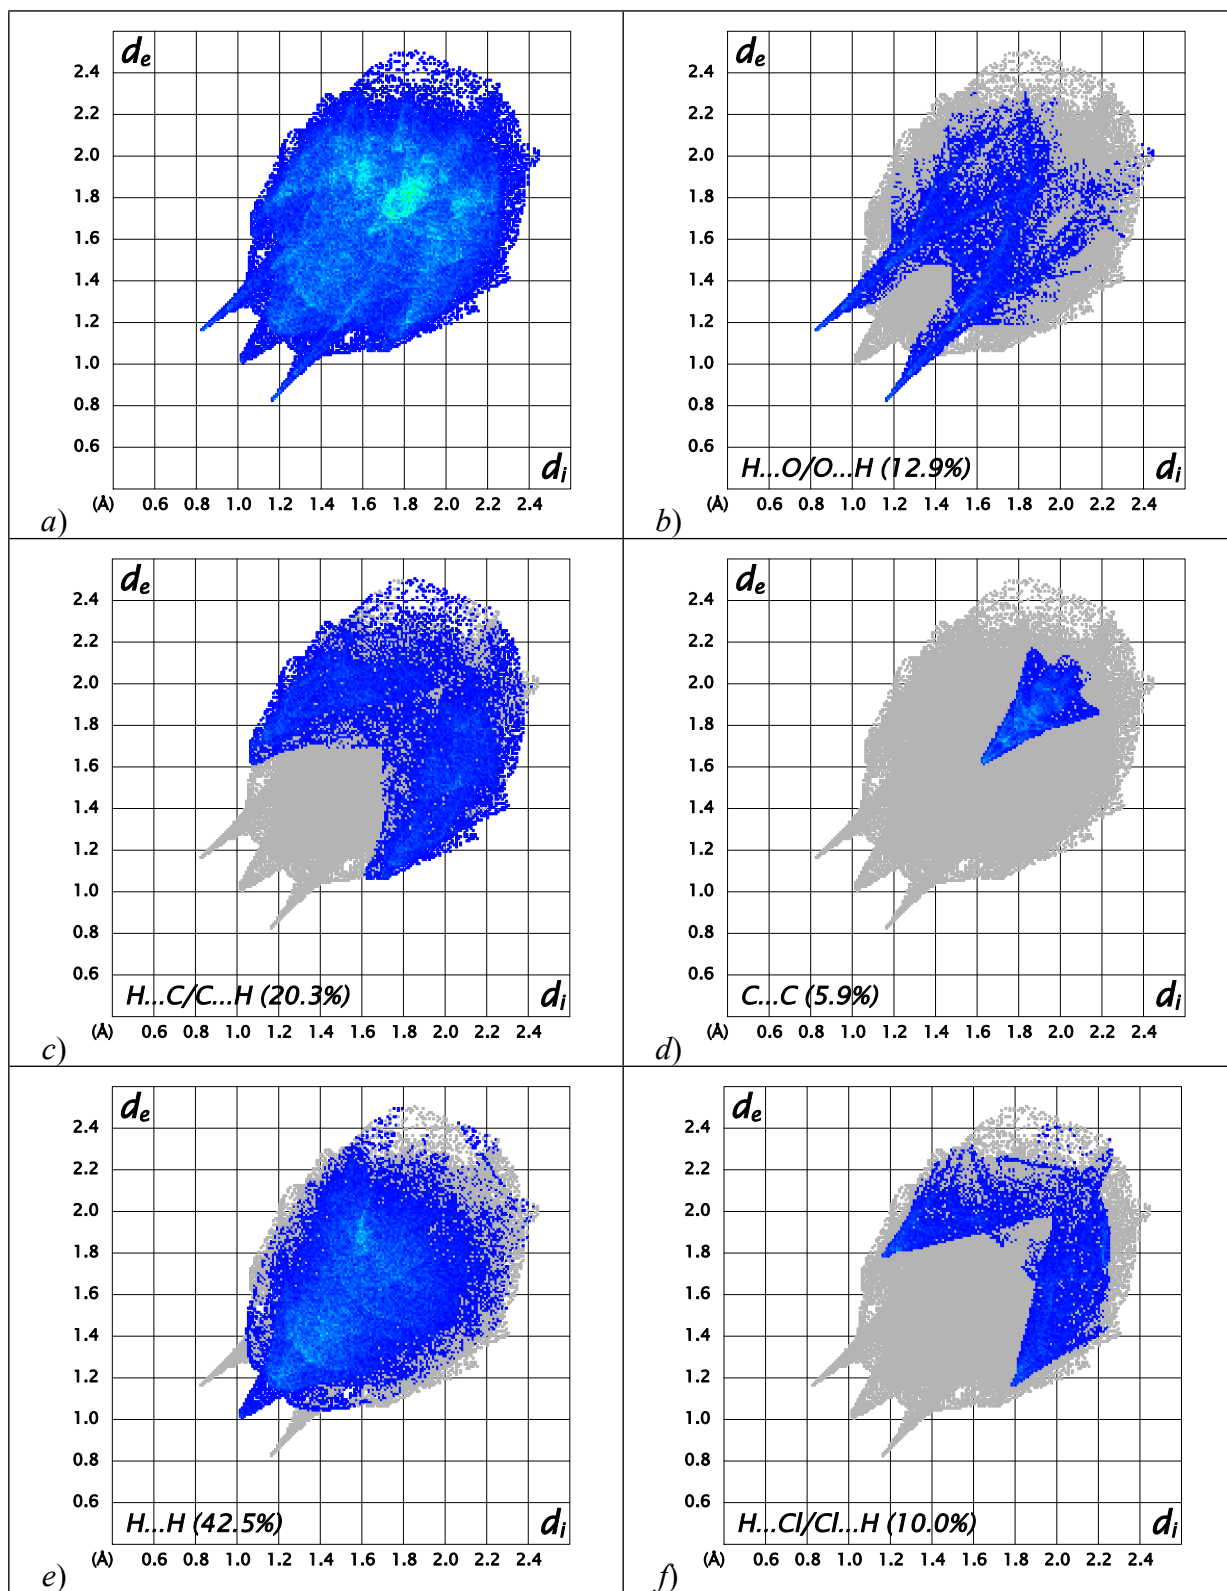

**Figure S8.** The full two-dimensional fingerprint plots of **1**, showing (a) all interactions, (b)  $H\cdots O/O\cdots H$ , (c)  $H\cdots C/C\cdots H$ , (d)  $C\cdots C$ , (e)  $H\cdots H$ , and (f)  $H\cdots Cl/Cl\cdots H$  interactions. The  $d_i$  and  $d_e$  values are the closest internal and external distances from given on the Hirshfeld surface contacts.



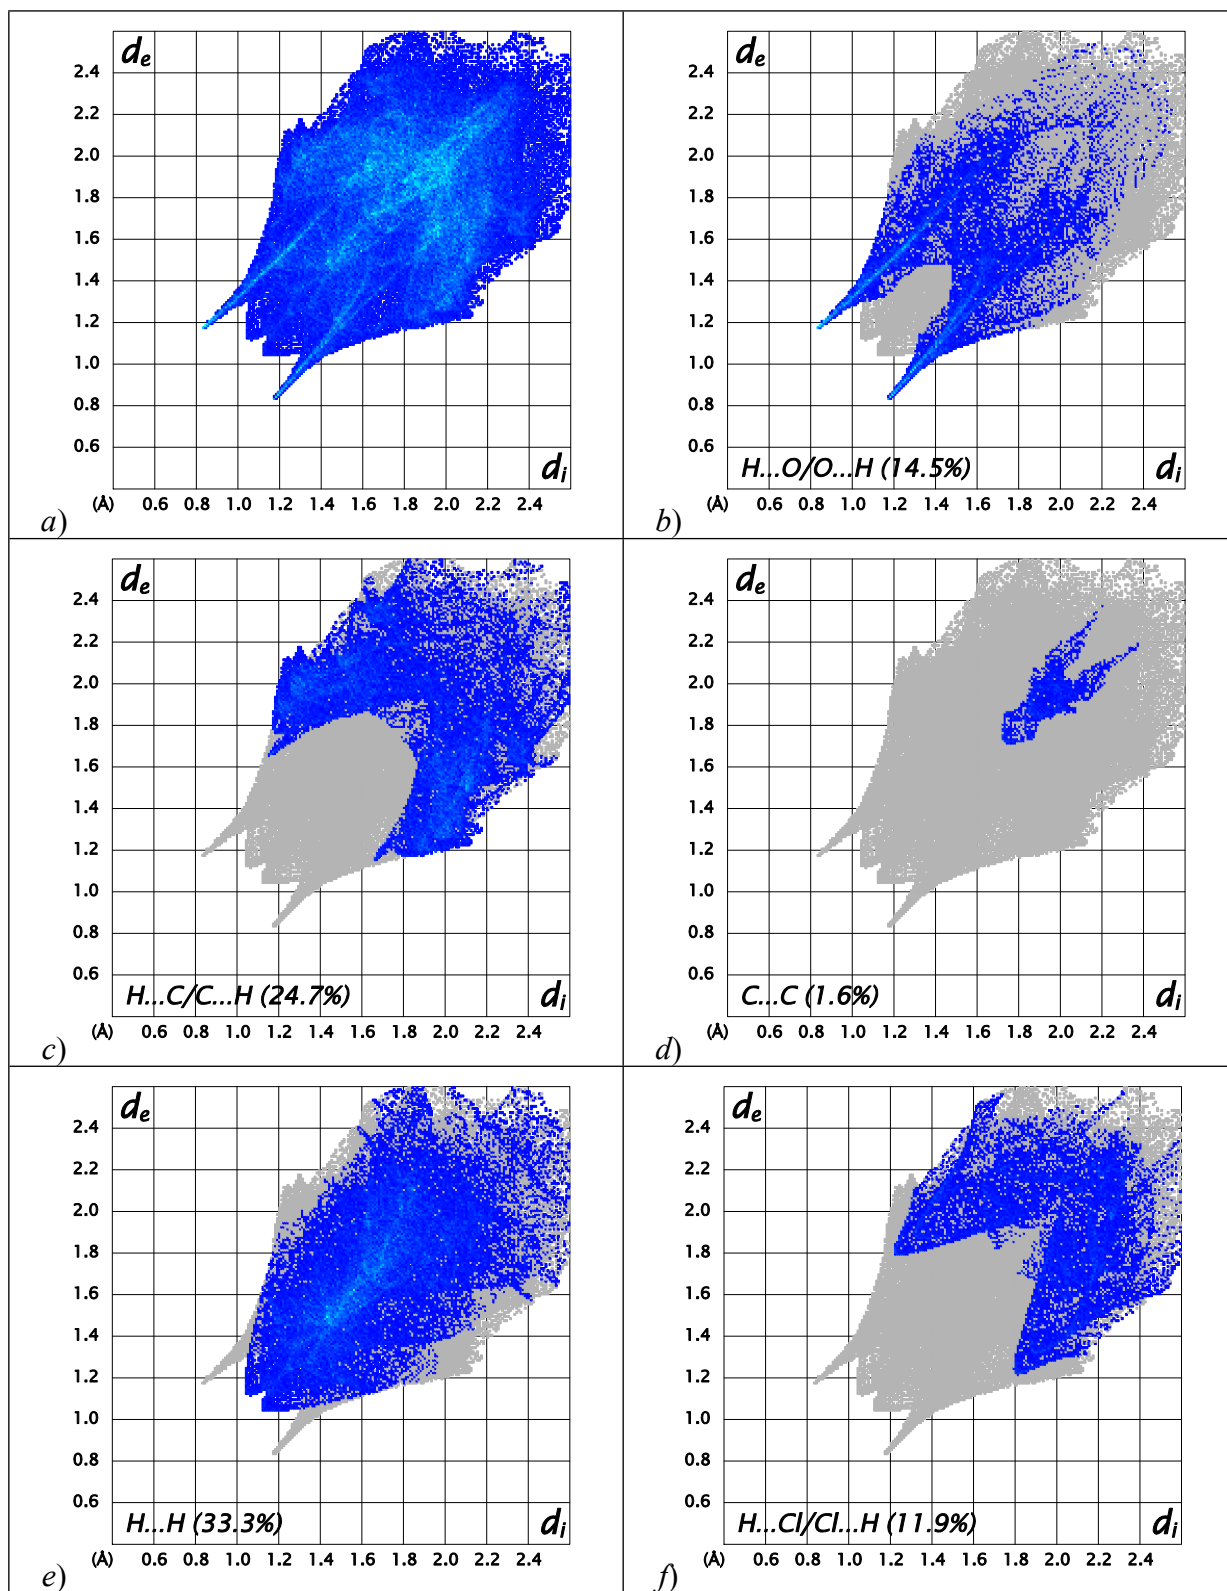

**Figure S9.** The full two-dimensional fingerprint plots of **2**, showing (a) all interactions, (b)  $H\cdots O/O\cdots H$ , (c)  $H\cdots C/C\cdots H$ , (d)  $C\cdots C$ , (e)  $H\cdots H$ , and (f)  $H\cdots Cl/Cl\cdots H$  interactions. The  $d_i$  and  $d_e$  values are the closest internal and external distances from given on the Hirshfeld surface contacts.

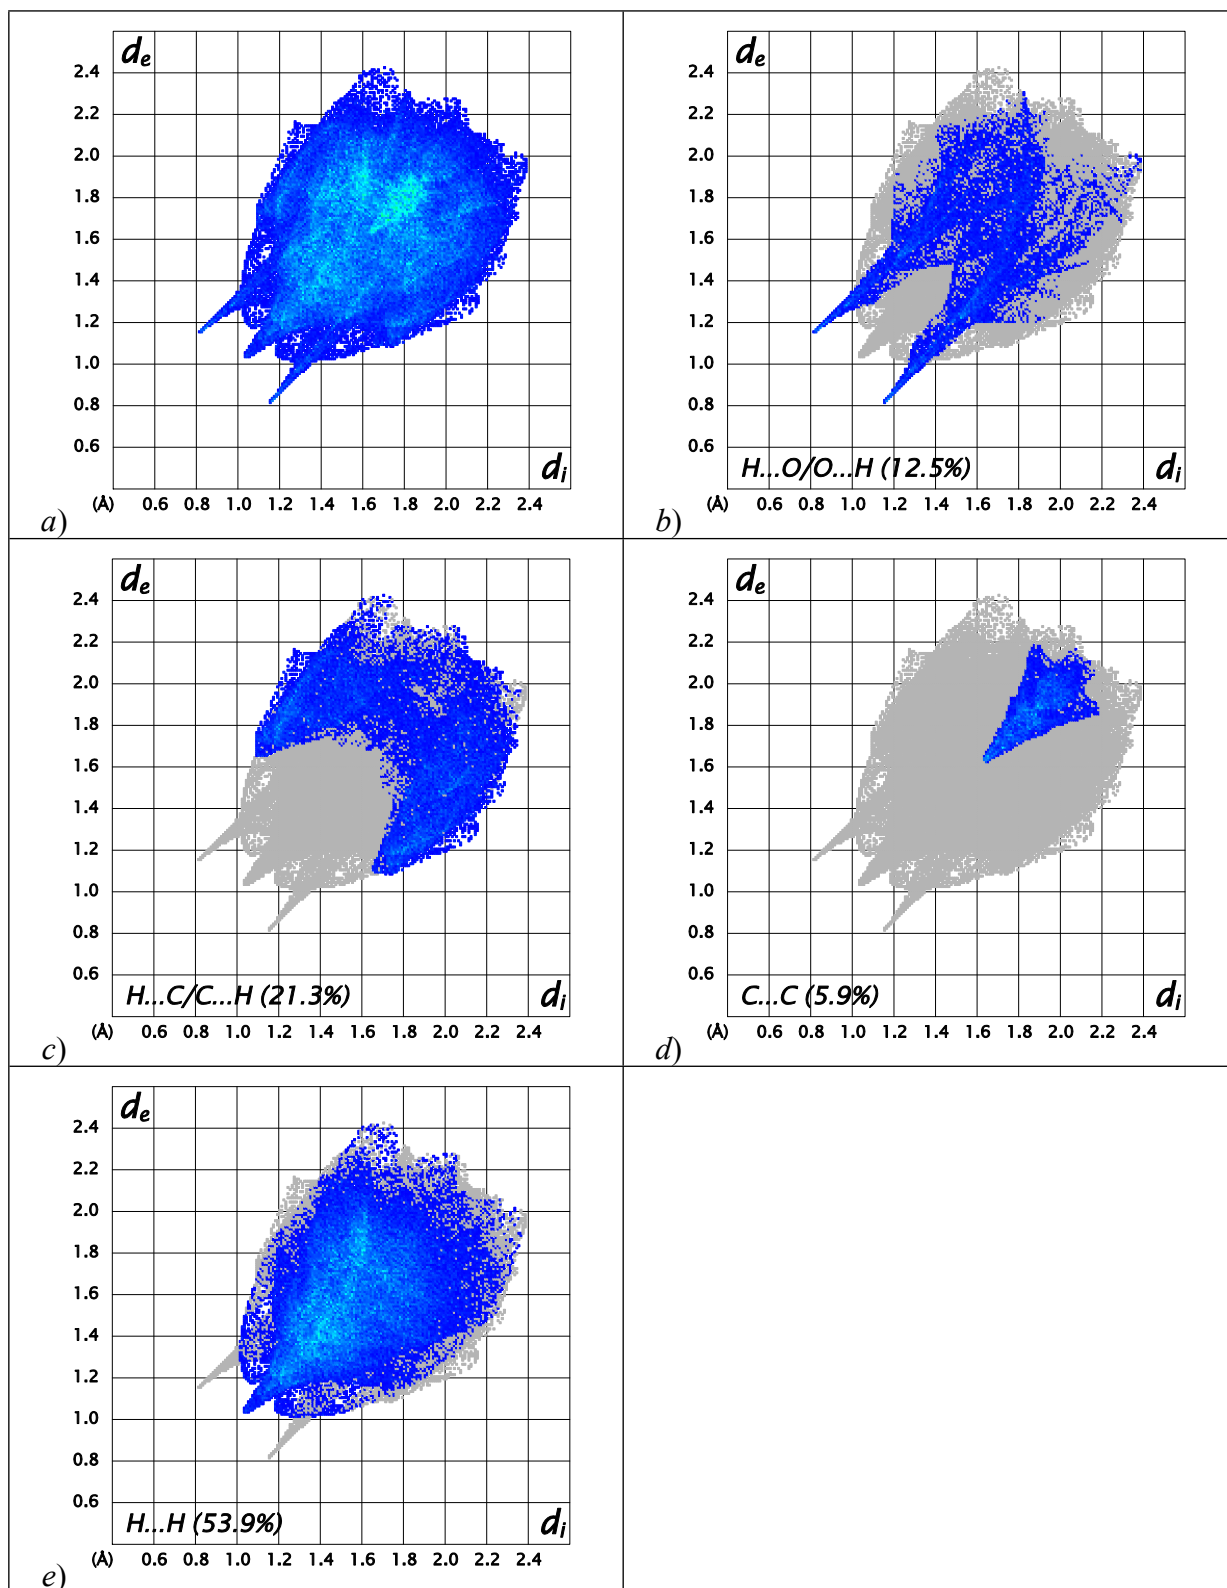

**Figure S10.** The full two-dimensional fingerprint plots of **3**, showing (a) all interactions, (b)  $H\cdots O/O\cdots H$ , (c)  $H\cdots C/C\cdots H$ , (d)  $C\cdots C$ , and (e)  $H\cdots H$  interactions. The  $d_i$  and  $d_e$  values are the closest internal and external distances from given on the Hirshfeld surface contacts.

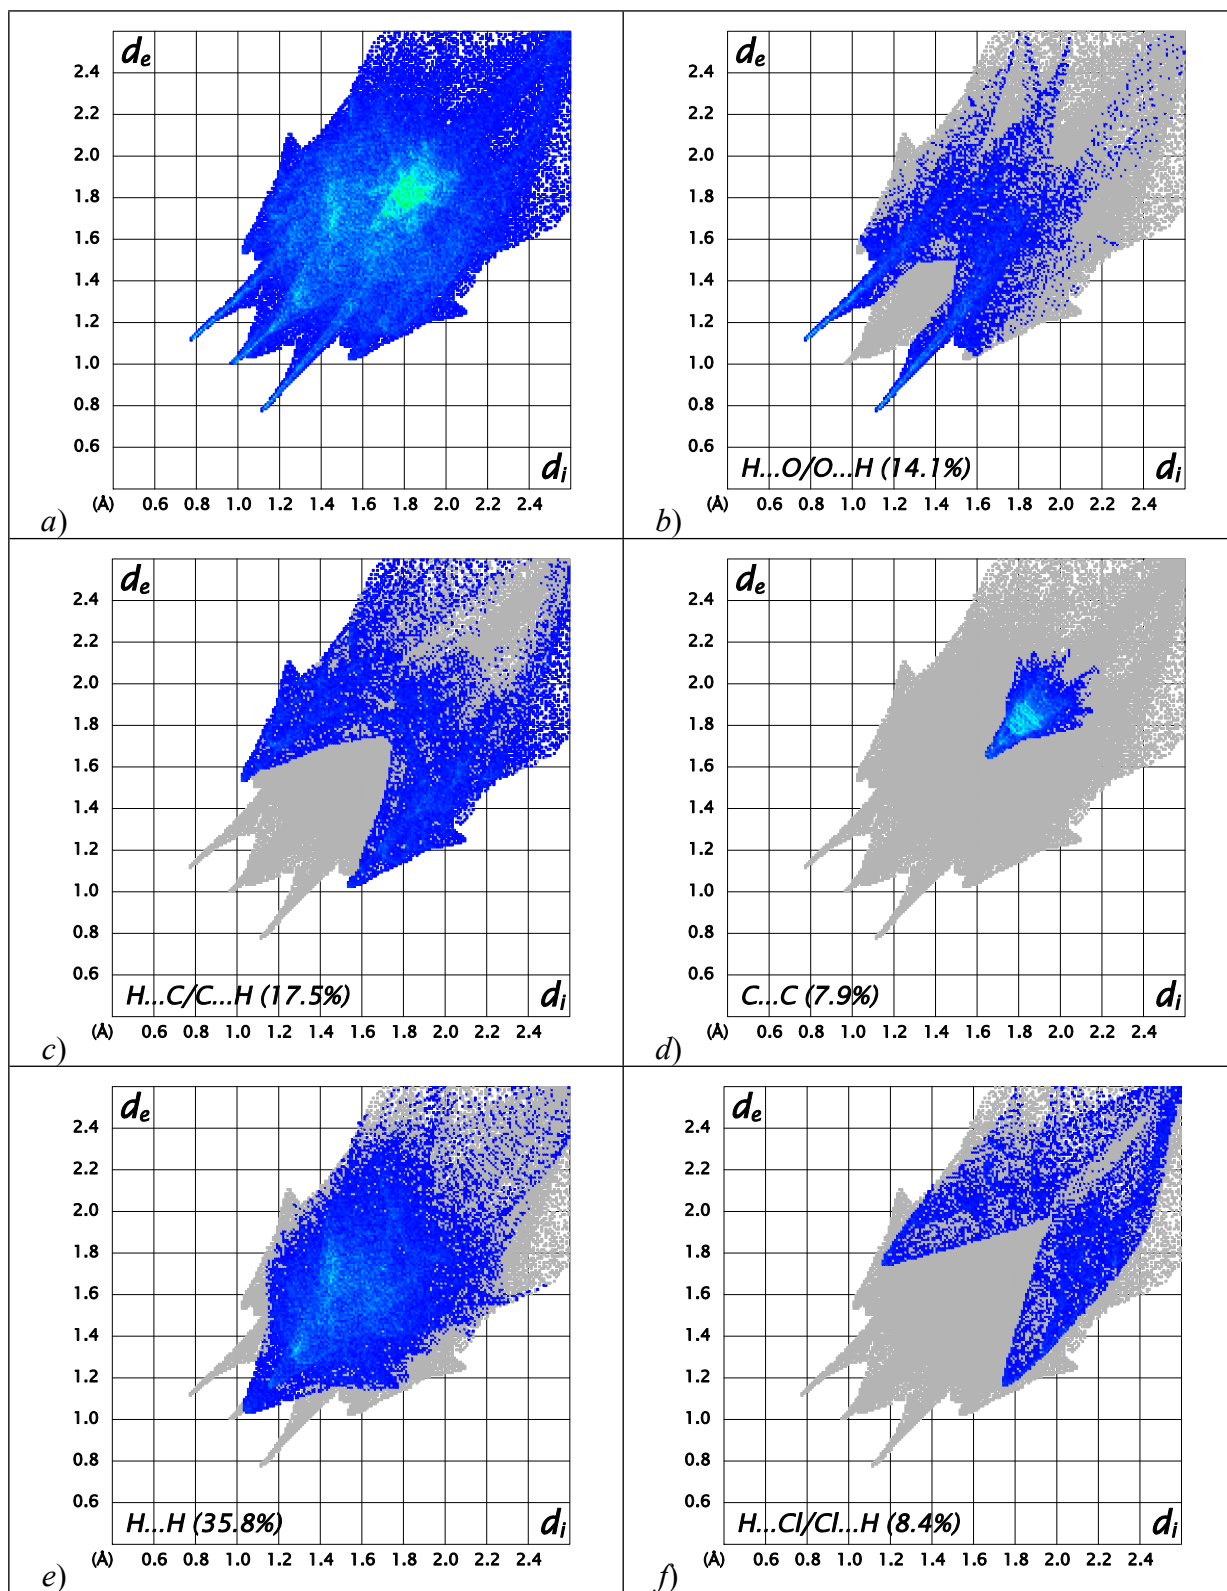

**Figure S11.** The full two-dimensional fingerprint plots of **4**, showing (a) all interactions, (b)  $H\cdots O/O\cdots H$ , (c)  $H\cdots C/C\cdots H$ , (d)  $C\cdots C$ , (e)  $H\cdots H$ , and (f)  $H\cdots Cl/Cl\cdots H$  interactions. The  $d_i$  and  $d_e$  values are the closest internal and external distances from given on the Hirshfeld surface contacts.

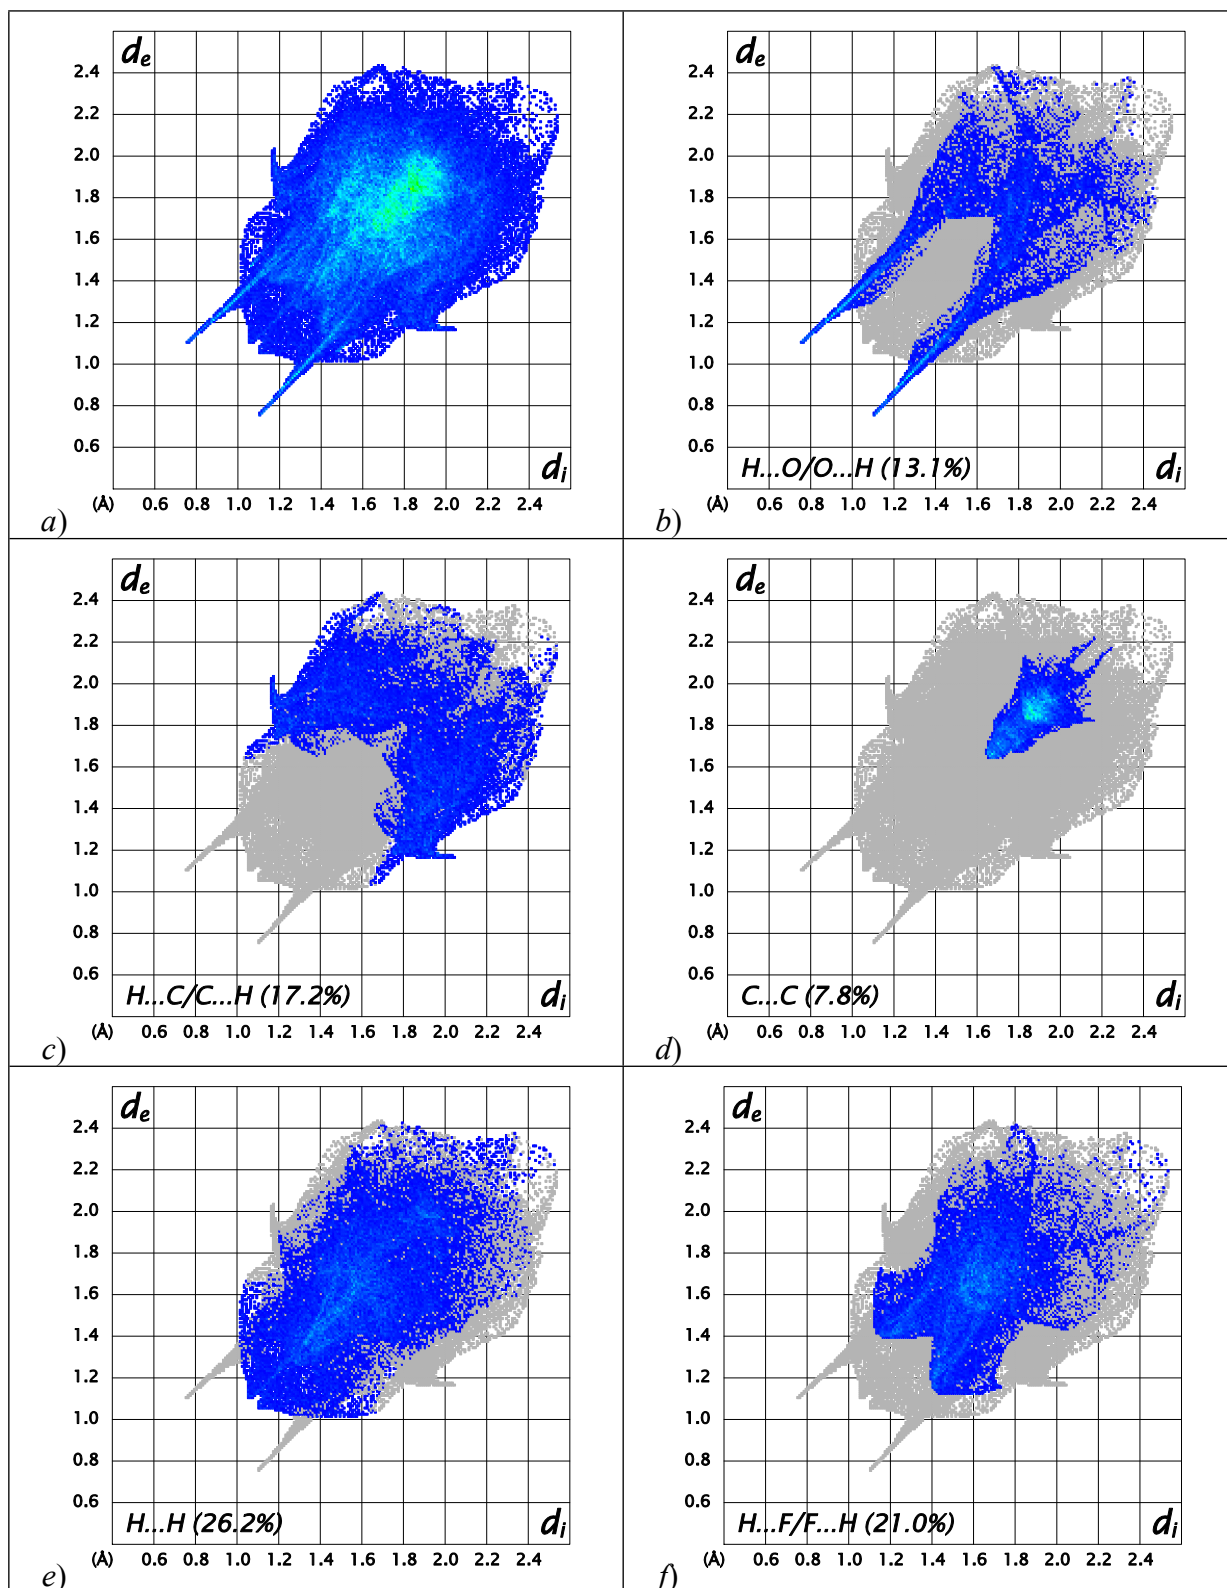

**Figure S12.** The full two-dimensional fingerprint plots of **5**, showing (a) all interactions, (b)  $H\cdots O/O\cdots H$ , (c)  $H\cdots C/C\cdots H$ , (d)  $C\cdots C$ , (e)  $H\cdots H$ , and (f)  $H\cdots F/F\cdots H$  interactions. The  $d_i$  and  $d_e$  values are the closest internal and external distances from given on the Hirshfeld surface contacts.



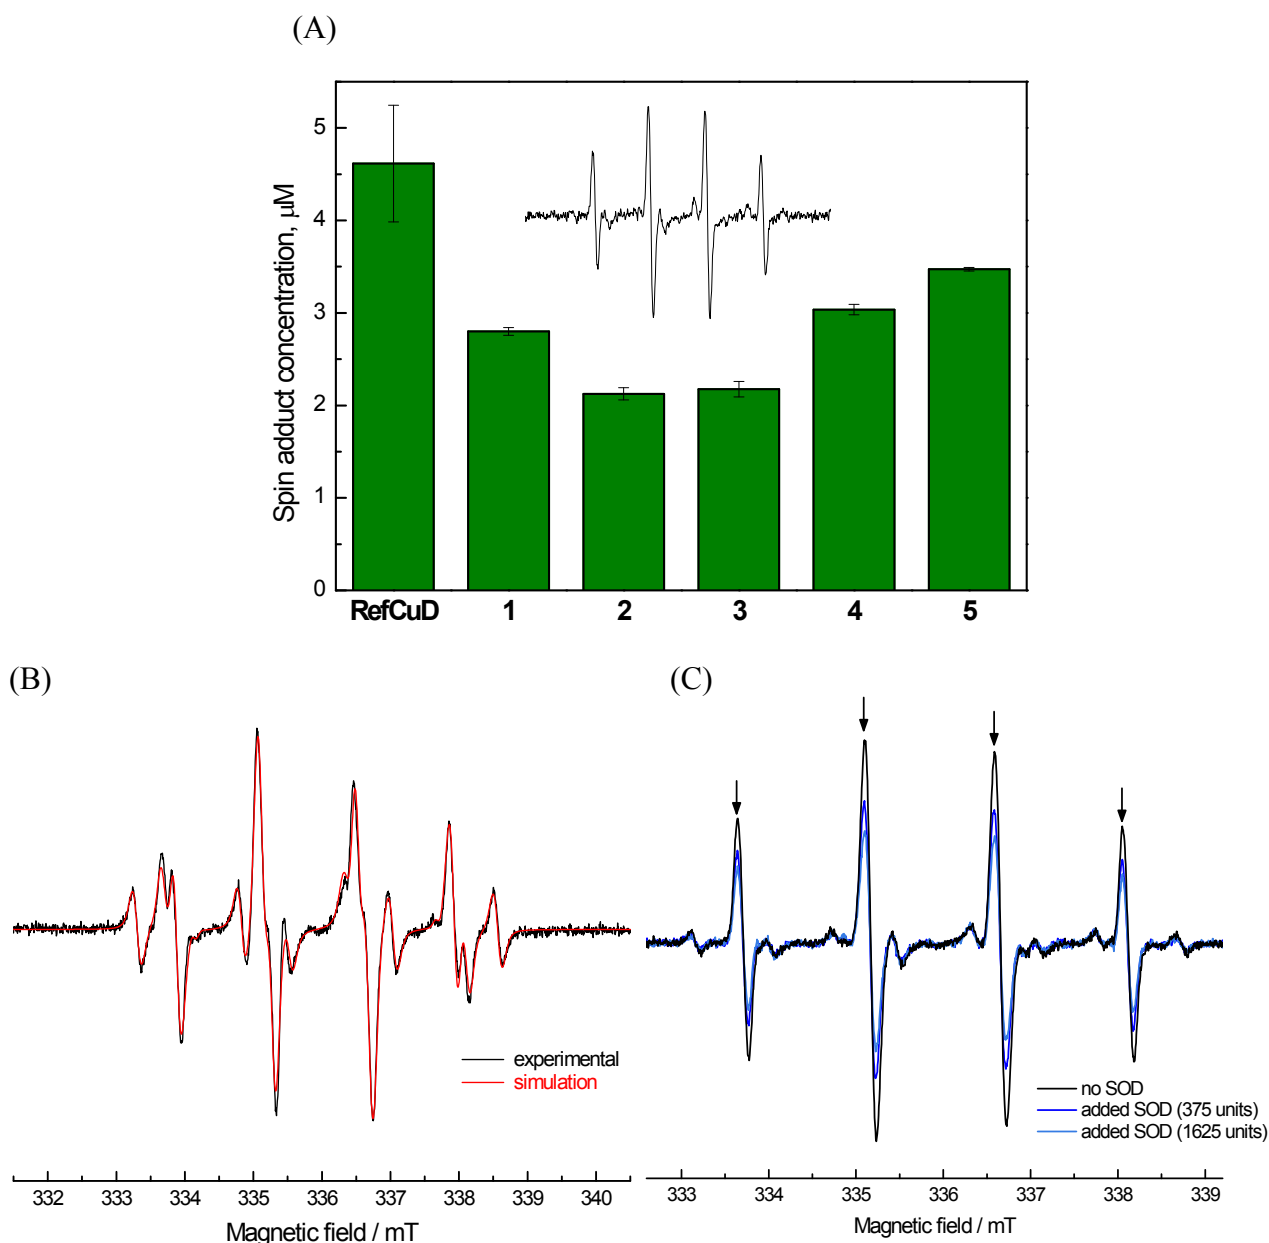

**Figure S13.** (A) The total concentration of DMPO spin-adducts observed in DMSO/water (1:4; v:v) solution of  $\text{CuCl}_2$  (reference) or studied copper complexes containing DMPO spin trapping agent after the addition of hydrogen peroxide. Inset represents the EPR spectrum measured for the system 5 /DMPO/ $\text{H}_2\text{O}_2$ / $\text{H}_2\text{O}$ /DMSO/air.(B) Experimental (—) and simulated (—) EPR spectra obtained in the system  $\text{CuCl}_2$ / $\text{H}_2\text{O}_2$ /BMPO/DMSO: $\text{H}_2\text{O}$ (1:4; v:v) under air. The simulation represents a linear combination of the EPR signals assigned to the following spin adducts:  $\bullet\text{BMPO-OH}(1)$  ( $a_N=1.41$  mT,  $a_H^\beta=1.26$  mT,  $a_H^\gamma=0.06$  mT;  $g=2.0057$ ; relative concentration 60%);  $\bullet\text{BMPO-OH}(2)$  ( $a_N=1.42$  mT,  $a_H^\beta=1.56$  mT,  $a_H^\gamma=0.05$  mT;  $g=2.0057$ ; 30%);  $\bullet\text{BMPO-CH}_3$  ( $a_N=1.52$  mT,  $a_H^\beta=2.21$  mT;  $g=2.0056$ ; 10%). (C) Decline of the EPR spectra obtained in the system  $\text{CuCl}_2$ / $\text{H}_2\text{O}_2$ /DMPO/DMSO: $\text{H}_2\text{O}$ (1:4; v:v) under air upon the addition of SOD. Initial concentrations:  $c(\text{CuCl}_2) = c(1-5) = 0.2$  mM;  $c(\text{DMPO/BMPO}) = 0.02$  M;  $c(\text{H}_2\text{O}_2) = 0.01$  M.



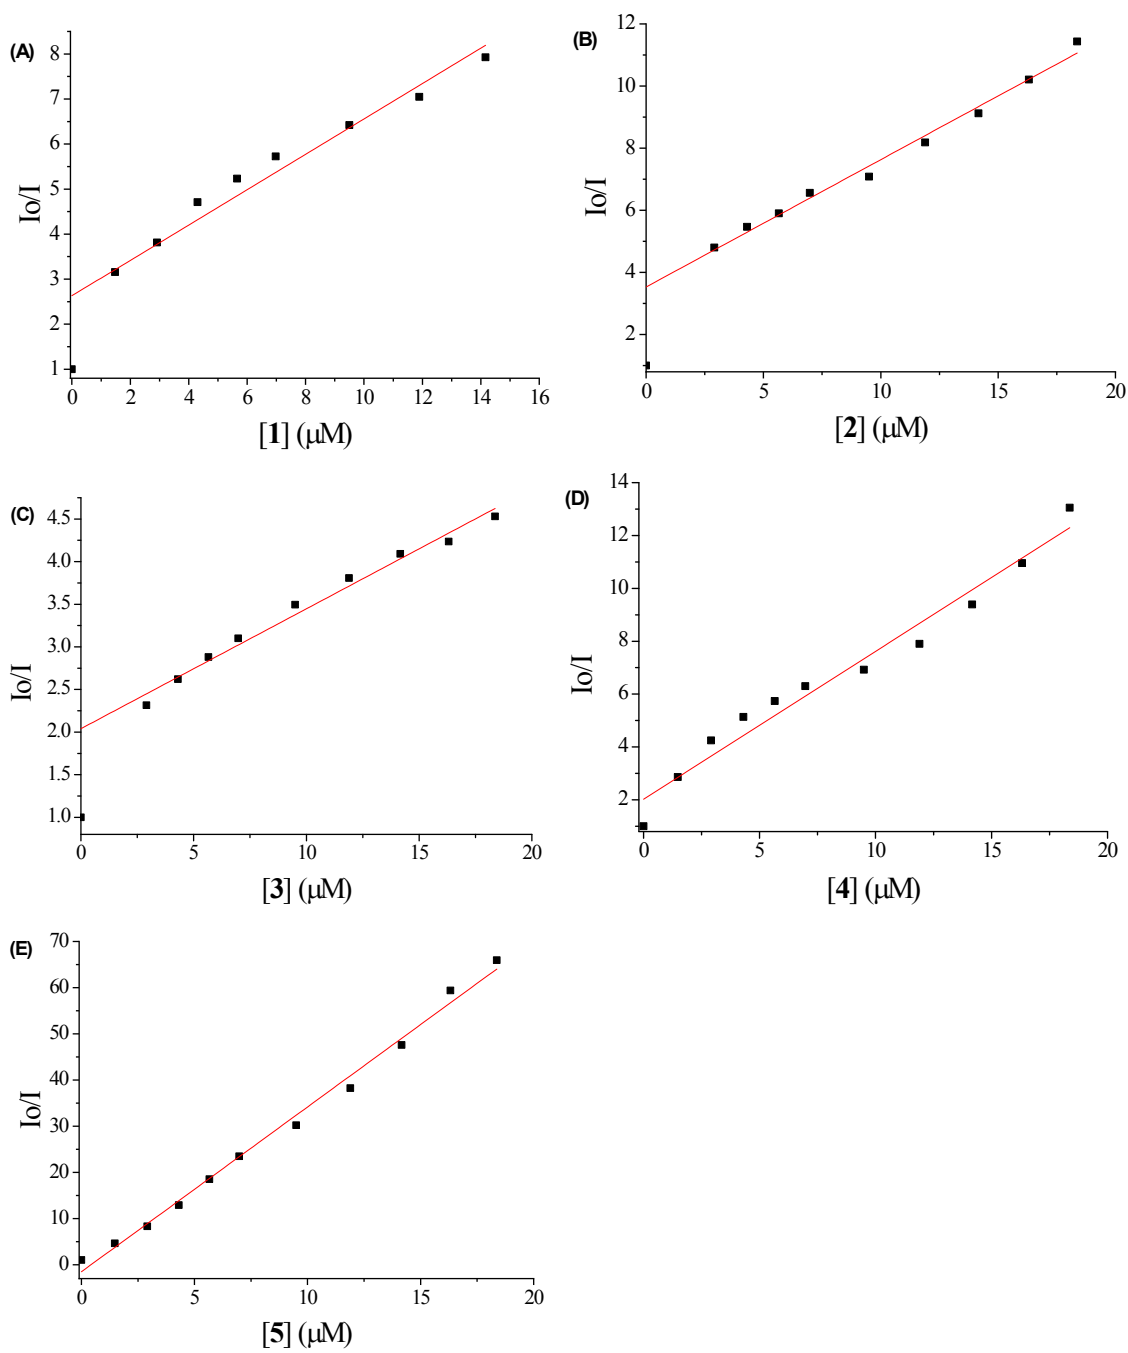

**Figure S14.** Stern-Volmer quenching plot of BSA for complex (A) 1, (B) 2, (C) 3, (D) 4 and (E) 5.

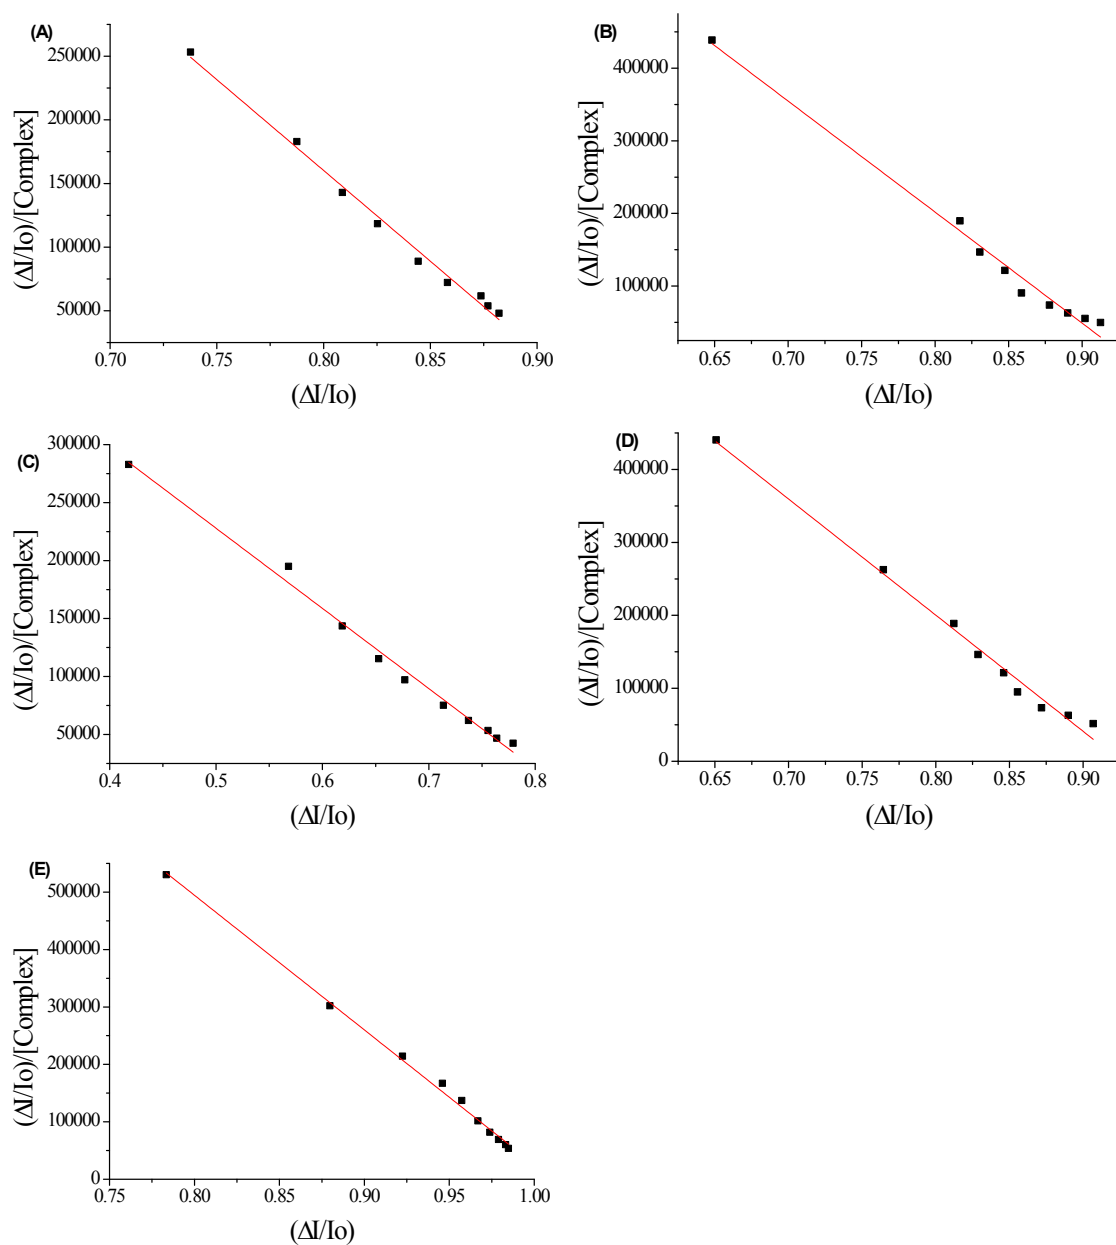

**Figure S15.** Scatchard plot of BSA for complex (A) 1, (B) 2, (C) 3, (D) 4 and (E) 5.

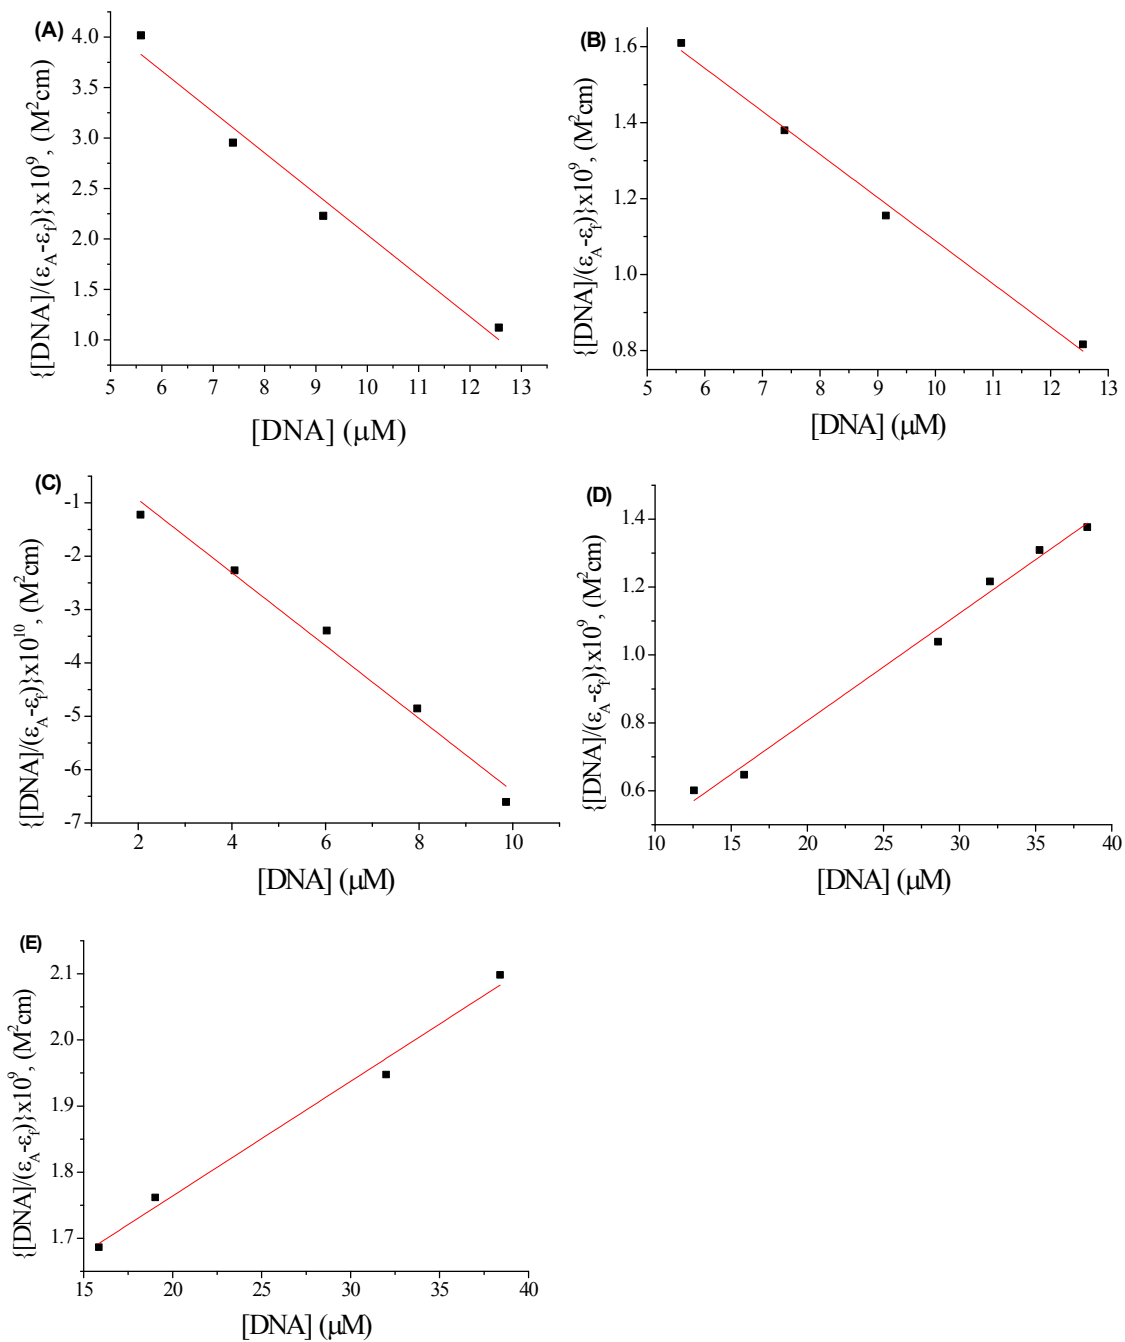

**Figure S16.** Plot of  $\frac{[DNA]}{(\epsilon_A - \epsilon_F)}$  versus  $[DNA]$  for complex (A) **1**, (B) **2**, (C) **3**, (D) **4** and (E) **5**.

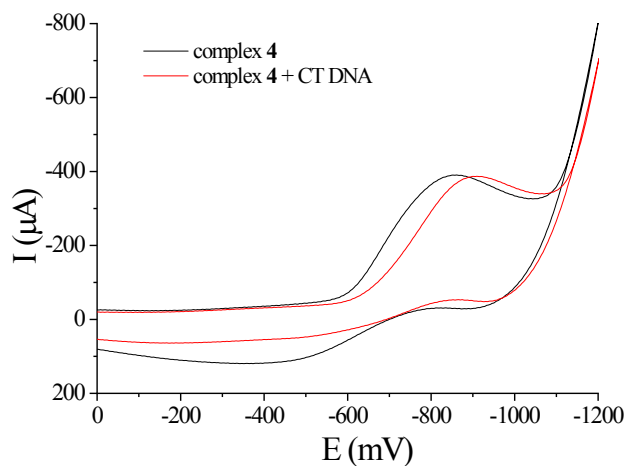

**Figure S17.** Cyclic voltammogram of 0.4 mM 1/2 DMSO/buffer (containing 150 mM NaCl and 15 mM trisodium citrate at pH = 7.0) solution of complex **4** in the absence (black line) or presence (red line) of CT DNA. Scan rate = 100  $\text{mV s}^{-1}$ . Supporting electrolyte = buffer solution. The arrows show the changes upon addition of CT DNA.

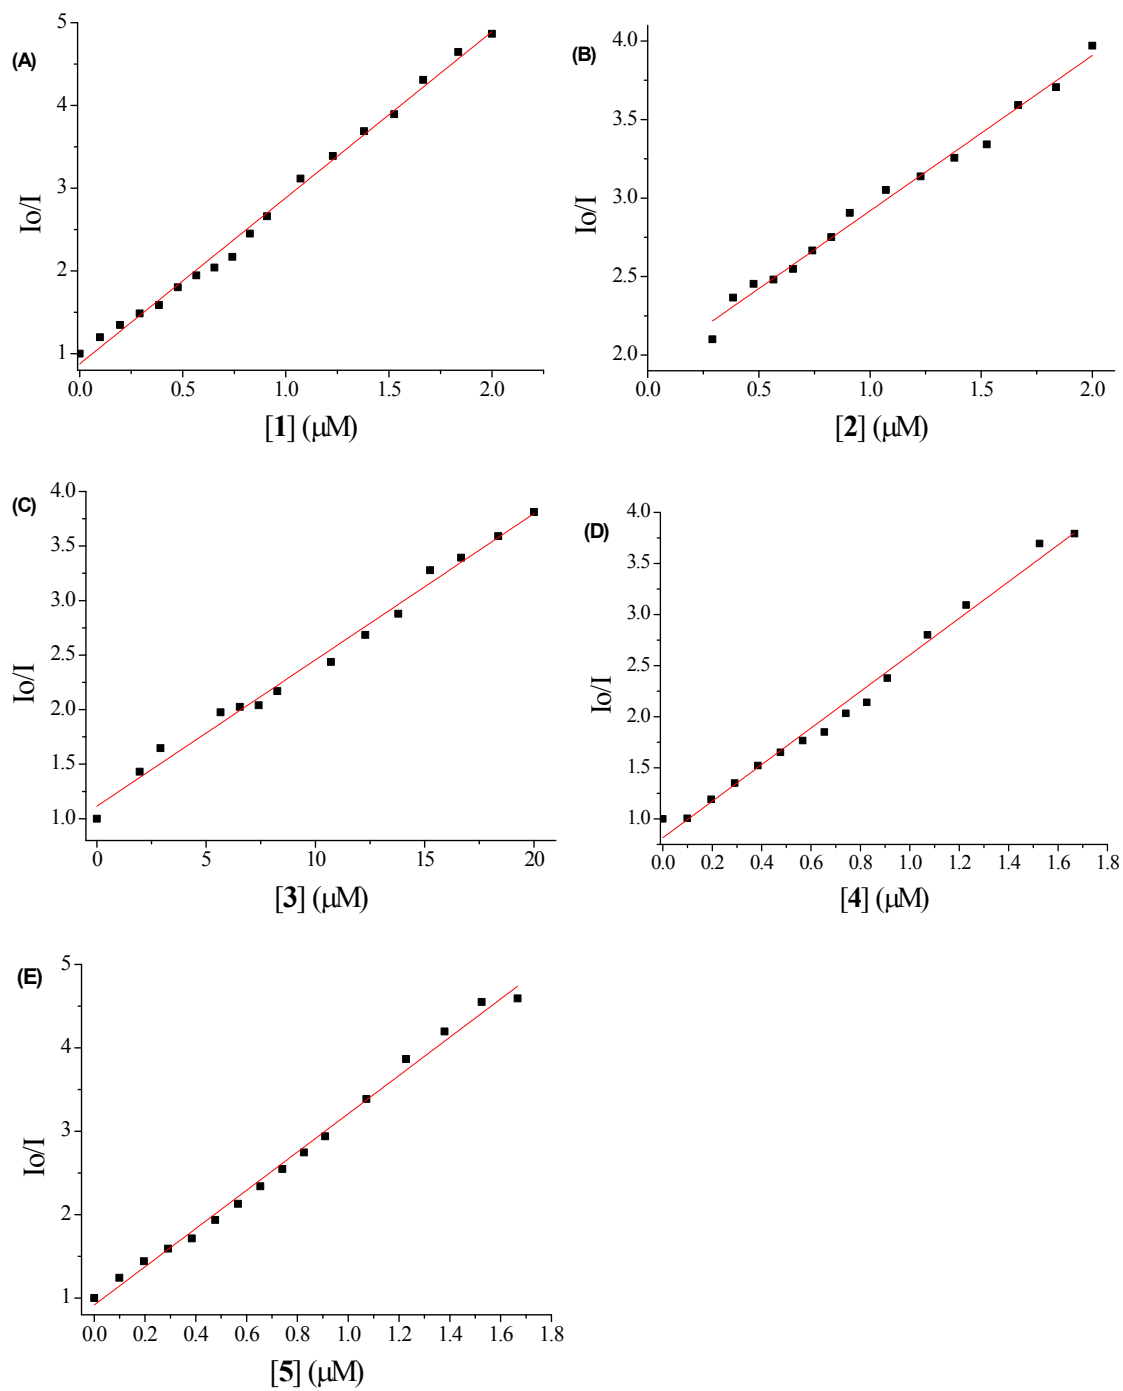

**Figure S18.** Stern-Volmer quenching plot of EB-DNA fluorescence for complex (A) 1, (B) 2, (C) 3, (D) 4 and (E) 5.
